# Supplementary material
Source: publisher site journal article supplement (https://www.dovepress.com/article/354911)
Supplement: Supplementary file 1 [file get_supplementary_file.php]

# Appendix I

## Evidence-based interventions

| Intervention                                                                      | Purpose (next to preventing falls)                                                                                                                                         | Population                                                                                                                                                                      | Duration                                                            | Level of evidence*                      |
|-----------------------------------------------------------------------------------|----------------------------------------------------------------------------------------------------------------------------------------------------------------------------|---------------------------------------------------------------------------------------------------------------------------------------------------------------------------------|---------------------------------------------------------------------|-----------------------------------------|
| A Matter of Balance-NL (Dutch: "Zicht op Evenwicht") <sup>47,48</sup>             | Reduce fear of falling and related misleading thoughts;<br>Improve daily activity.                                                                                         | Older people who are worried about falling and/or who avoid activities as a result of their fear for falling                                                                    | 16 group-sessions with<br>1 follow up session<br>8 weeks<br>2 hours | IV<br>Strong evidence for effectiveness |
| In Balance (Dutch: "In Balans") <sup>49</sup>                                     | Increase awareness of high falls risk situations;<br>Influence activity behaviour;<br>Improve condition, mobility, confidence and relaxation.                              | Independently living people aged ≥65 and older people living in residential care centres who feel insecure and/or anxious about falling                                         | 24 group-sessions 14 weeks<br>1-2 hours                             | I<br>Well substantiated                 |
| Nijmegen Falls Prevention Programme (Dutch: "Vallen Verleden Tijd") <sup>50</sup> | Increase awareness of high falls risk situations;<br>Decrease fear of falling;<br>Improve activity level, mobility and balance.                                            | Community dwelling older people who should be able to walk 15 minutes without aid and with a high risk of falling based on mobility problems, falls history and fear of falling | 10 group-sessions 5 weeks<br>1.5 hours                              | IV<br>Strong evidence for effectiveness |
| OTAGO <sup>51-54</sup>                                                            | Improve static and dynamic balance, leg muscle strength, walking ability, general endurance, activities of daily living function, confidence;<br>Decrease fear of falling. | Community dwelling people aged ≥65 with a high risk of falls and frail older people                                                                                             | 6 home visits and 11 monitoring moments by phone                    | I<br>Well substantiated                 |

\* Level of evidence defined by the Dutch Centre for Healthy Living which varies from O (well described) to IV (strong evidence for effectiveness)

# Appendix II

## Recruitment of participants within implementation study

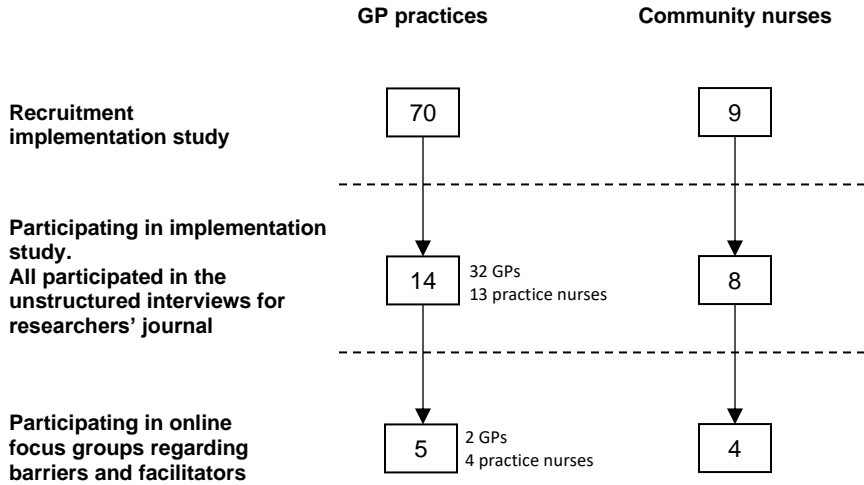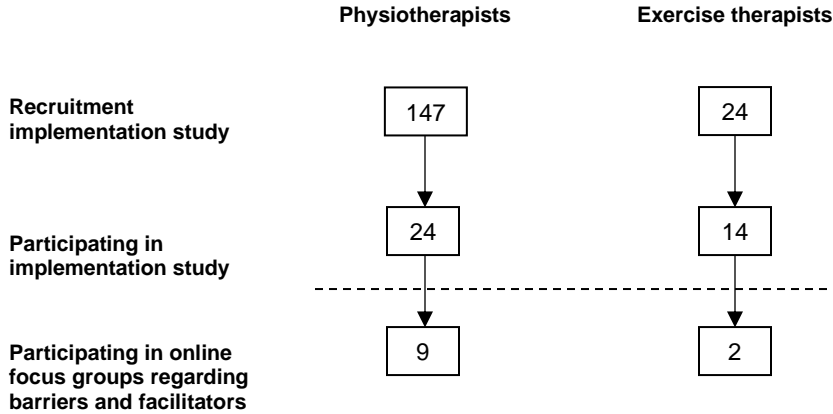

# Appendix III

## Coding scheme

| Theme                                   | Sub code                        | Including                  | TDF domain                                                                                                 |
|-----------------------------------------|---------------------------------|----------------------------|------------------------------------------------------------------------------------------------------------|
| <b>Care provider characteristics</b>    | Tasks                           | Tasks division             | D1 Knowledge, Role clarity<br>D3 Social/ professional role and identity                                    |
|                                         |                                 | Clarity of tasks           |                                                                                                            |
|                                         | Provision care                  | Individual approach        | D4 Beliefs about capabilities                                                                              |
|                                         |                                 | Complexity                 |                                                                                                            |
|                                         | Awareness importance            | Falls prevention           | D6 Beliefs about consequences, Outcome expectancies                                                        |
|                                         |                                 | Identification             |                                                                                                            |
|                                         |                                 | Exercise                   |                                                                                                            |
|                                         | Knowledge and Skills            | Training                   | D1 Knowledge, Knowledge<br>D2 Skills<br>D6 Beliefs about consequences, attitude<br>D13 Innovation strategy |
|                                         |                                 | Experience                 |                                                                                                            |
|                                         | Behavior                        |                            | D17 Behavioral regulation<br>D18 Nature of behaviors                                                       |
|                                         | Attitude                        | Falls prevention (general) | D6 Beliefs about consequences, attitude, outcome expectations<br>D13 Innovation strategy                   |
|                                         |                                 | Assessment (instrument)    |                                                                                                            |
| EB training (therapists)                |                                 |                            |                                                                                                            |
| Training (nurses)                       |                                 |                            |                                                                                                            |
| Interventions                           |                                 |                            |                                                                                                            |
| Priorities                              |                                 | D8 Goals                   |                                                                                                            |
| Intention (to provide falls prevention) |                                 | D7 Intentions              |                                                                                                            |
| <b>Context characteristics</b>          | Financial (Reimbursement/costs) |                            | D10 Socio-political context                                                                                |
|                                         | Time (care provider)            |                            | D10 Socio-political context<br>D11 Organization, Organizational resources and support                      |
|                                         | Collaboration                   |                            | D14 Social influences, Social support                                                                      |
|                                         | Support                         |                            | D11 Organization, Organizational resources and support                                                     |
|                                         | Informal care providers         |                            | D10 Socio-political context                                                                                |

|                                                             |                       |                                                               |                                         |
|-------------------------------------------------------------|-----------------------|---------------------------------------------------------------|-----------------------------------------|
|                                                             |                       |                                                               | D12 Patient (family/social environment) |
|                                                             | Referrals             |                                                               | D14 Social influences                   |
| <b>Patient characteristics</b>                              | Motivation            | (Willingness to invest) time and money                        | D12 Patient                             |
|                                                             |                       | Embarrassment                                                 |                                         |
|                                                             |                       | Realistic goals                                               |                                         |
|                                                             |                       | Self-confidence                                               |                                         |
|                                                             |                       | Awareness                                                     |                                         |
|                                                             |                       | Expectations                                                  |                                         |
|                                                             |                       | (Physical) improvement                                        |                                         |
|                                                             | Shame                 |                                                               |                                         |
| Health issues                                               | Mobility              |                                                               |                                         |
| Behavior                                                    |                       |                                                               |                                         |
| <b>Innovation (EB-interventions)</b>                        | Format                | Group/individual                                              | D9 Innovation                           |
|                                                             |                       | Customized                                                    |                                         |
|                                                             |                       | Set-up (space/material)                                       |                                         |
|                                                             | Importance            |                                                               |                                         |
|                                                             | Not-prevention        |                                                               |                                         |
| Intensity                                                   |                       |                                                               |                                         |
| <b>Innovation strategy (Falls risk assessment strategy)</b> | Implementation        | (also see code: Care provider-Knowledge and skills- Training) | D13 Innovation strategy                 |
|                                                             | Falls risk assessment |                                                               |                                         |
| <b>Barriers</b>                                             |                       |                                                               |                                         |
| <b>Facilitators</b>                                         |                       |                                                               |                                         |
| <b>Solutions</b>                                            |                       |                                                               |                                         |
